# Supplementary material
Source: Springer Nature journal article supplement (https://www.springermedizin.de/resource/supplementary/12890_2013_486_MOESM4_ESM.pdf/9505566)
Supplement: MOESM4 [file 9505566]

**Online Supplementary Table 2 Spearman correlations between Delta N2 and (expiratory/inspiratory) values, for the four slices.**

|                                         | <b>Delta N2</b> |                  |
|-----------------------------------------|-----------------|------------------|
|                                         | value           | P                |
| <b>E/I<sub>MLD</sub>1</b>               | 0.39444         | <b>0.0001</b>    |
| <b>E/I<sub>.850-1024</sub> 1</b>        | 0.31606         | <b>0.0021</b>    |
| <b>E/I<sub>.850-910</sub> 1</b>         | 0.35737         | <b>0.0005</b>    |
| <b>E/I<sub>MLD</sub> 2</b>              | 0.45451         | <b>&lt;.0001</b> |
| <b>E/I<sub>.850-1024</sub> 2</b>        | 0.30639         | <b>0.0030</b>    |
| <b>E/I<sub>.850-910</sub> 2</b>         | 0.37390         | <b>0.0002</b>    |
| <b>E/I<sub>MLD</sub> 3</b>              | 0.38598         | <b>0.0001</b>    |
| <b>E/I<sub>.850-1024</sub> 3</b>        | 0.23977         | <b>0.0213</b>    |
| <b>E/I<sub>.850-910</sub> 3</b>         | 0.34211         | <b>0.0008</b>    |
| <b>E/I<sub>MLD</sub> 4</b>              | 0.29793         | <b>0.0039</b>    |
| <b>E/I<sub>.850-1024</sub> 4</b>        | 0.18236         | <b>0.0819</b>    |
| <b>E/I<sub>.850-910</sub> 4</b>         | 0.29647         | <b>0.0041</b>    |
| <b>E/I<sub>MLD</sub> MEAN</b>           | 0.40075         | <b>&lt;.0001</b> |
| <b>E/I<sub>.850-1024</sub> MEAN</b>     | 0.29556         | <b>0.0042</b>    |
| <b>E/I<sub>.850-910</sub> MEAN</b>      | 0.37355         | <b>0.0002</b>    |
| <b>(E-I)/I<sub>MLD</sub> 1</b>          | 0.39444         | <b>0.0001</b>    |
| <b>(E-I)/I<sub>.850-1024</sub> 1</b>    | 0.31606         | <b>0.0021</b>    |
| <b>(E-I)/I<sub>.850-910</sub> 1</b>     | 0.35737         | <b>0.0005</b>    |
| <b>(E-I)/I<sub>MLD</sub> 2</b>          | 0.45451         | <b>&lt;.0001</b> |
| <b>(E-I)/I<sub>.850-1024</sub> 2</b>    | 0.30639         | <b>0.0030</b>    |
| <b>(E-I)/I<sub>.850-910</sub> 2</b>     | 0.37390         | <b>0.0002</b>    |
| <b>(E-I)/I<sub>MLD</sub> 3</b>          | 0.38598         | <b>0.0001</b>    |
| <b>(E-I)/I<sub>.850-1024</sub> 3</b>    | 0.23977         | <b>0.0213</b>    |
| <b>(E-I)/I<sub>.850-910</sub> 3</b>     | 0.34211         | <b>0.0008</b>    |
| <b>(E-I)/I<sub>MLD</sub> 4</b>          | 0.29793         | <b>0.0039</b>    |
| <b>(E-I)/I<sub>.850-1024</sub> 4</b>    | 0.18236         | <b>0.0819</b>    |
| <b>(E-I)/I<sub>.850-910</sub> 4</b>     | 0.29647         | <b>0.0041</b>    |
| <b>(E-I)/I<sub>MLD</sub> MEAN</b>       | 0.40075         | <b>&lt;.0001</b> |
| <b>(E-I)/I<sub>.850-1024</sub> MEAN</b> | 0.29556         | <b>0.0042</b>    |
| <b>(E-I)/I<sub>.850-910</sub> MEAN</b>  | 0.37355         | <b>0.0002</b>    |
